# Supplementary material for: Structural and dynamics evidence for scaffold asymmetric flexibility of the human transthyretin tetramer
Source: PubMed Central journal article supplement (PMC5730205; doi:10.1371/journal.pone.0187716), 2017-12-14

# STRUCTURAL AND DYNAMICS EVIDENCE FOR SCAFFOLD ASYMMETRIC FLEXIBILITY OF THE HUMAN TRANSTHYRETIN TETRAMER

Giuseppe Zanotti <sup>1</sup>, Francesca Vallese <sup>1</sup>, Alberto Ferrari <sup>2</sup>, Ilaria Menozzi <sup>2</sup>, Tadeo E. Saldaño <sup>3</sup>,  
Paola Berto <sup>1</sup>, Sebastian Fernandez-Alberti <sup>3</sup>, and Rodolfo Berni <sup>2</sup>

<sup>a</sup> Department of Biomedical Sciences, University of Padua, Padua, Italy

<sup>b</sup> Department of Chemical Sciences, Life Sciences and Environmental Sustainability, University of Parma, Parma, Italy

<sup>c</sup> Universidad Nacional de Quilmes/CONICET, Bernal, Argentina

**Fig. S1. Aggregation states for mutant forms (F87M/L110M and F87M/L110M/S117E) of human TTR in solution.** Wild type and mutant forms of human TTR, at a concentration of 0.5 mg/ml in 16  $\mu$ l of 50 mM sodium phosphate, 150 mM sodium chloride, pH 7.5, in the presence (+T) or in the absence (-T) of 30  $\mu$ M tafamidis (dissolved in DMSO), were analyzed by SDS-PAGE after quaternary structure fixation by incubation with 4  $\mu$ l of 25% (v/v) glutaraldehyde for 5 minutes at room temperature. The cross-linking reaction was terminated by the addition of 5  $\mu$ l of sodium borohydrate (7% w/v in 0.1 M NaOH). Samples that were not cross-linked (NCL) were also analyzed for a comparison.

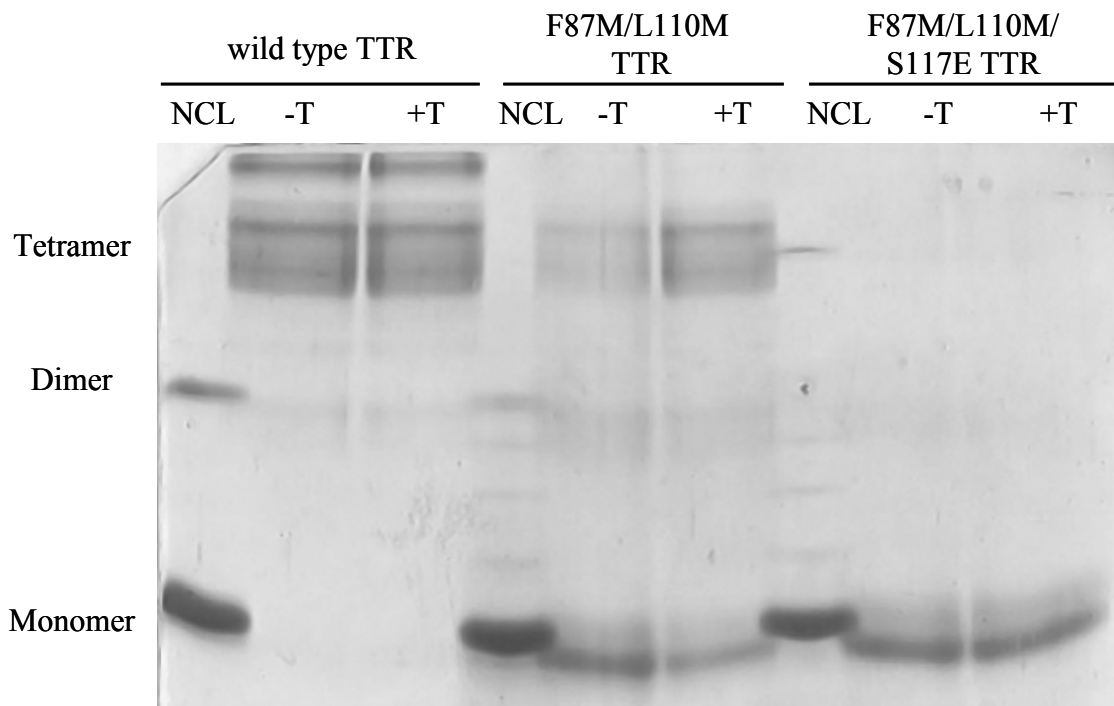

Supplement: pone.0187716.s001.pdf [file pone.0187716.s001.pdf]
